# Supplementary material
Source: PubMed Central journal article supplement (PMC5680038)
Supplement: NIHMS916260-supplement-SI.pdf [file NIHMS916260-supplement-SI.pdf]

# Time-Resolved Investigations of Heterobimetallic Cofactor Assembly in R2lox Reveal Distinct Mn/Fe Intermediates

Effie K. Miller,<sup>b</sup> Nicholas E. Trivelas,<sup>a</sup> Pearson T. Maugeri,<sup>c</sup> Elizabeth J. Blaes,<sup>d</sup> and Hannah S.

Shafaat<sup>a,b,c\*</sup>

<sup>a</sup>Department of Chemistry and Biochemistry, <sup>b</sup>The Ohio State Biochemistry Program, and <sup>c</sup>The Ohio State Biophysics Program, The Ohio State University, Columbus, OH 43210, USA.

<sup>d</sup>Department of Chemistry, The Pennsylvania State University, University Park, PA 16802, USA.

## **Supporting Information**

## Table of Contents

|                                                                                                                             |     |
|-----------------------------------------------------------------------------------------------------------------------------|-----|
| Figure S1: SDS-PAGE of WT <i>Gk</i> R2loxI.....                                                                             | S3  |
| Figure S2: Long-term monitoring of UV-Vis reconstitutions.....                                                              | S4  |
| Figure S3: Evidence of weak divalent metal binding in R2lox .....                                                           | S5  |
| Figure S4: Graphical model of R2lox assembly in H <sub>2</sub> O and D <sub>2</sub> O.....                                  | S6  |
| Figure S5: Graphical model of R2lox assembly as k <sub>diff</sub> is varied.....                                            | S7  |
| Table S1: Fitted rate constants to model.....                                                                               | S8  |
| Figure S6: Model with and without inclusion of O <sub>2</sub> -adduct .....                                                 | S9  |
| Figure S7: 2D FitSpace analysis on overall fit of kinetic model.....                                                        | S10 |
| Figure S8: CW X-band EPR spectra of Mn <sup>II</sup> -only R2lox and 300 ms RFQ samples .....                               | S11 |
| Figure S9: Formation and decay of I <sub>1</sub> EPR spectra measured at 30 K .....                                         | S12 |
| Figure S10: Multiple examples of I <sub>1</sub> EPR spectra at t = 1 min measured at 30 K .....                             | S13 |
| Figure S11: Zoomed-in low-field region of I <sub>1</sub> EPR spectra for <sup>NA</sup> Fe and <sup>57</sup> Fe samples..... | S14 |
| Figure S12: Formation of I <sub>2</sub> EPR spectra measured at 10 K .....                                                  | S15 |
| Figure S13: Decay of I <sub>2</sub> EPR spectra measured at 6.7 K .....                                                     | S16 |
| Figure S14: Singular value decomposition (SVD) of Mn/Fe R2lox in D <sub>2</sub> O.....                                      | S17 |
| Figure S15: Global fitting analysis from SVD of Mn/Fe R2lox in H <sub>2</sub> O and D <sub>2</sub> O .....                  | S18 |
| Figure S16: SF-Abs of Mn/Fe R2lox in H <sub>2</sub> O and D <sub>2</sub> O.....                                             | S19 |
| Figure S17: Kinetics of product formation monitored using EPR spectroscopy.....                                             | S20 |
| Figure S18: Normalized SF-Abs at 320 nm, 390 nm, and 620 nm.....                                                            | S21 |
| Figure S19: SF-Abs of Mn/Fe R2lox at 390 nm and 620 nm in H <sub>2</sub> O and D <sub>2</sub> O.....                        | S22 |
| Figure S20: SF-Abs metal titrations of Mn/Fe R2lox.....                                                                     | S23 |
| Figure S21: Diode-Array SF-Abs spectra of Mn/Fe R2lox assembly.....                                                         | S24 |
| Figure S22: Decay of I <sub>2</sub> EPR spectra in D <sub>2</sub> O measured at 6.7 K .....                                 | S25 |
| Figure S23: Decay of I <sub>1</sub> EPR spectra in D <sub>2</sub> O measured at 30 K .....                                  | S26 |
| Figure S24. KIEs of each intermediate observed <i>via</i> EPR.....                                                          | S27 |
| Figure S25. Optical and EPR kinetic profile comparison of each intermediate .....                                           | S28 |
| Figure S26. Variable-temperature EPR spectra of HQ t = 1 min sample .....                                                   | S29 |
| Figure S27. Temperature dependence on EPR intensities of intermediate species .....                                         | S30 |
| Figure S28: Power dependence at 30 K of I <sub>1</sub> EPR spectrum .....                                                   | S31 |
| References.....                                                                                                             | S32 |

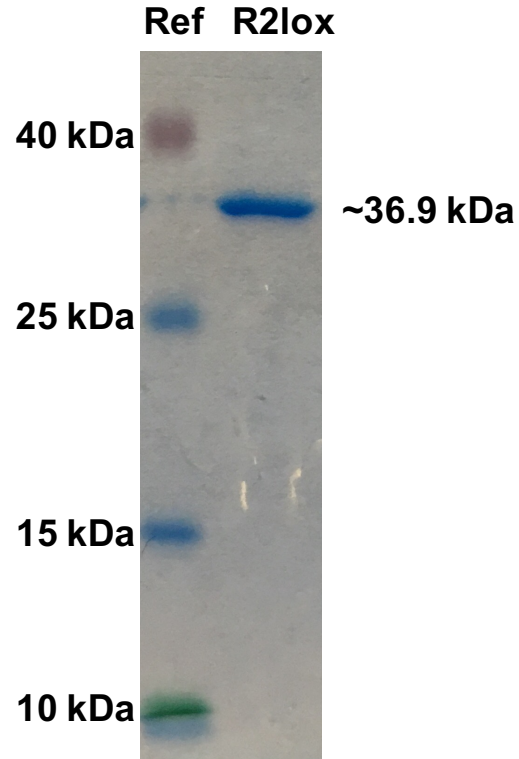

**Figure S1.** 12% SDS-PAGE of WT *Gk* R2loxI referenced against Spectra Multicolor low range protein ladder (Thermo Fisher Scientific).

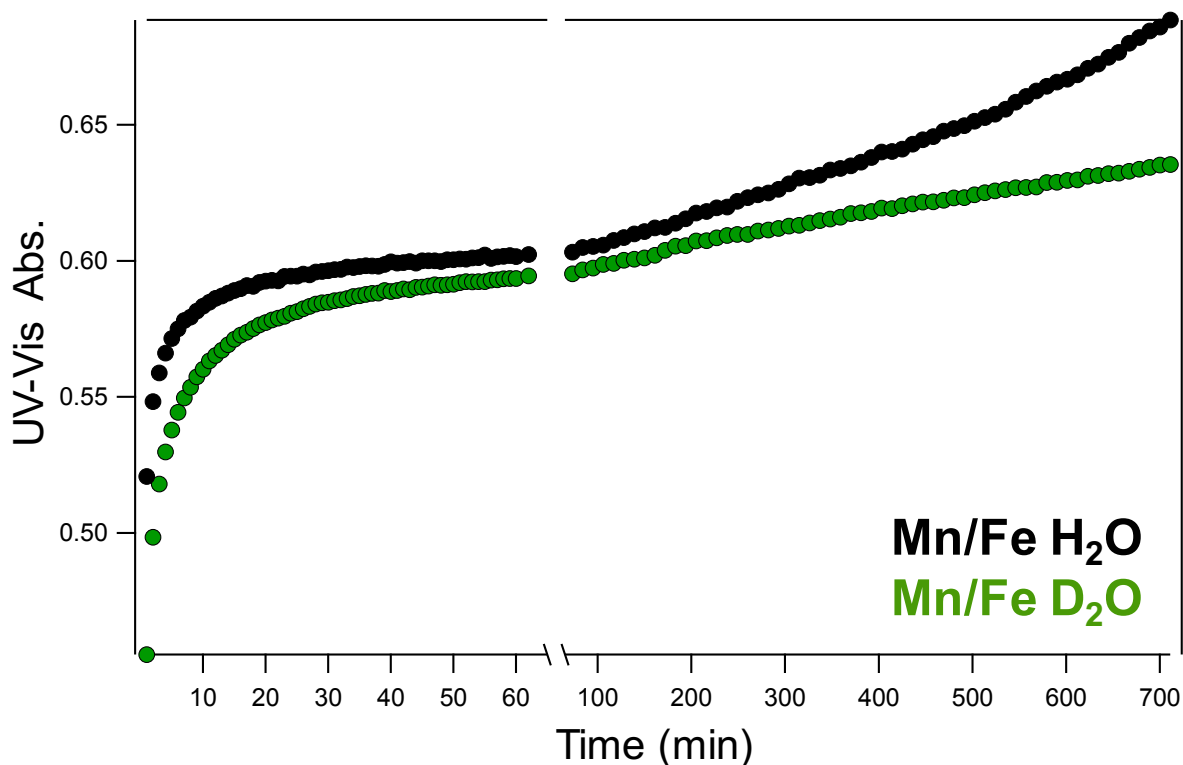

**Figure S2.** Long-term monitoring of UV-Vis reconstitutions. Stoichiometric Mn/Fe reconstitutions were performed in both protiated and deuterated buffers and monitored over ~12 hours to resolve complete cofactor stabilization. Data from 1-60 minutes were collected at the standard rate of one data point/minute. After the initial 60 minute period, spectra were taken every 10 minutes, with approximately 1 minute required to obtain each spectrum, resulting in a total of 11 minutes represented per data point. Sample absorbance appeared to level out prior to 2 hours; however, continued incubation showed increasing absorbance. This long-term absorbance increase in both samples was attributed to oxidation of excess Fe<sup>II</sup> in solution. This agrees with previous work, which demonstrates quantitative metallation does not always occur in Mn/Fe R2lox.<sup>1</sup>

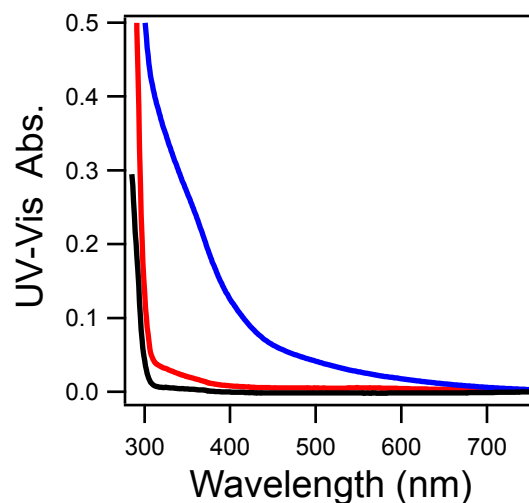

**Figure S3.** Evidence of weak divalent metal binding in R2lox. Optical spectra of 100  $\mu\text{M}$  apo-R2lox (black); 100  $\mu\text{M}$  apo-R2lox + 1 equiv.  $\text{Mn}^{\text{II}}$  + 1 equiv.  $\text{Fe}^{\text{II}}$  prepared under anaerobic conditions and activated by addition of oxygenated buffer (blue); and 100  $\mu\text{M}$  apo-R2lox + 1 equiv.  $\text{Mn}^{\text{II}}$  + 1 equiv.  $\text{Fe}^{\text{II}}$  prepared under anaerobic conditions, with excess metal ions removed *via* desalting column prior to activation by addition of oxygenated buffer (red), as per the methodology of Bollinger, Krebs, and coworkers.<sup>2</sup> Only low yields of reconstituted protein (< 10%) are observed following desalting. Using the previously reported  $\epsilon_{350} = 3000 \text{ M}^{-1} \text{ cm}^{-1}$ , a  $K_{\text{D}}$  for metal binding of approximately 0.1-1 mM is estimated.<sup>3</sup>

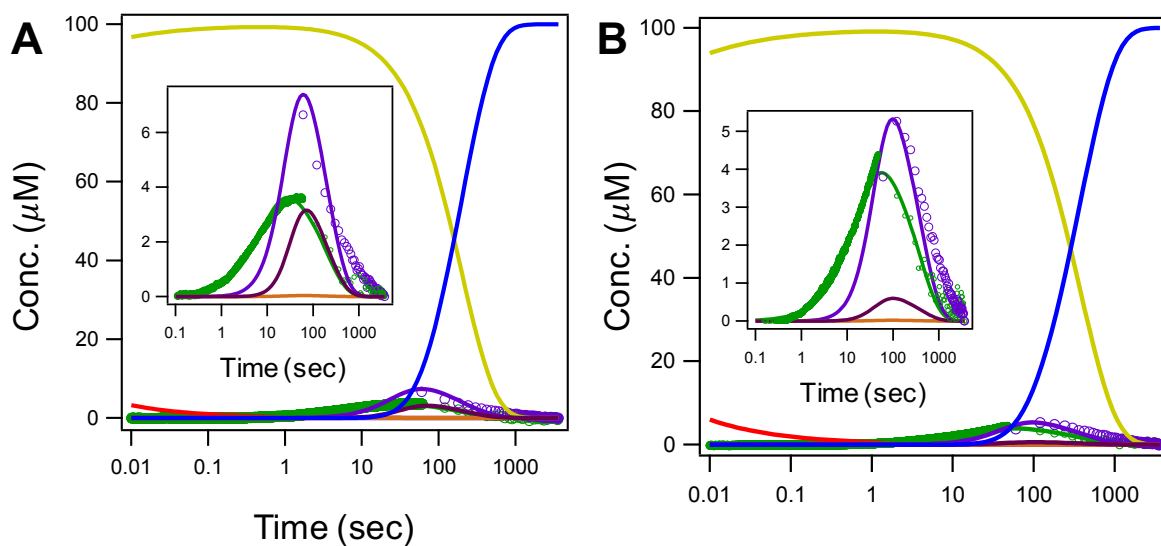

**ApoR2lox**, **Fe<sup>II</sup>-R2lox**, **Mn<sup>II</sup>Fe<sup>II</sup>-R2lox**, **O<sub>2</sub> Adduct**, **μ(O<sub>2</sub>)-Mn<sup>III</sup>Fe<sup>III</sup>**, **“IV/IV”**, **“IV/III”**, **Bis-μ(O)μ(OH)**, **Product**

**Figure S4.** Graphical representation of R2lox reaction model as portrayed by KinTek software (v.6.0), developed from reaction steps outlined in Materials and Methods. Assembly and maturation of Mn/Fe R2lox is modeled based on data obtained in both (A) protiated and (B) deuterated buffers. The Mn binding site (Site 1) is crystallographically disordered in apo-R2lox and only becomes ordered upon Fe binding in Site 2; therefore, Fe binding in Site 2 is thought to occur first. Because stoichiometric amounts of each metal were included in the experiments, the kinetic model is independent of metal binding order. Work is currently underway to experimentally determine order of metal binding.

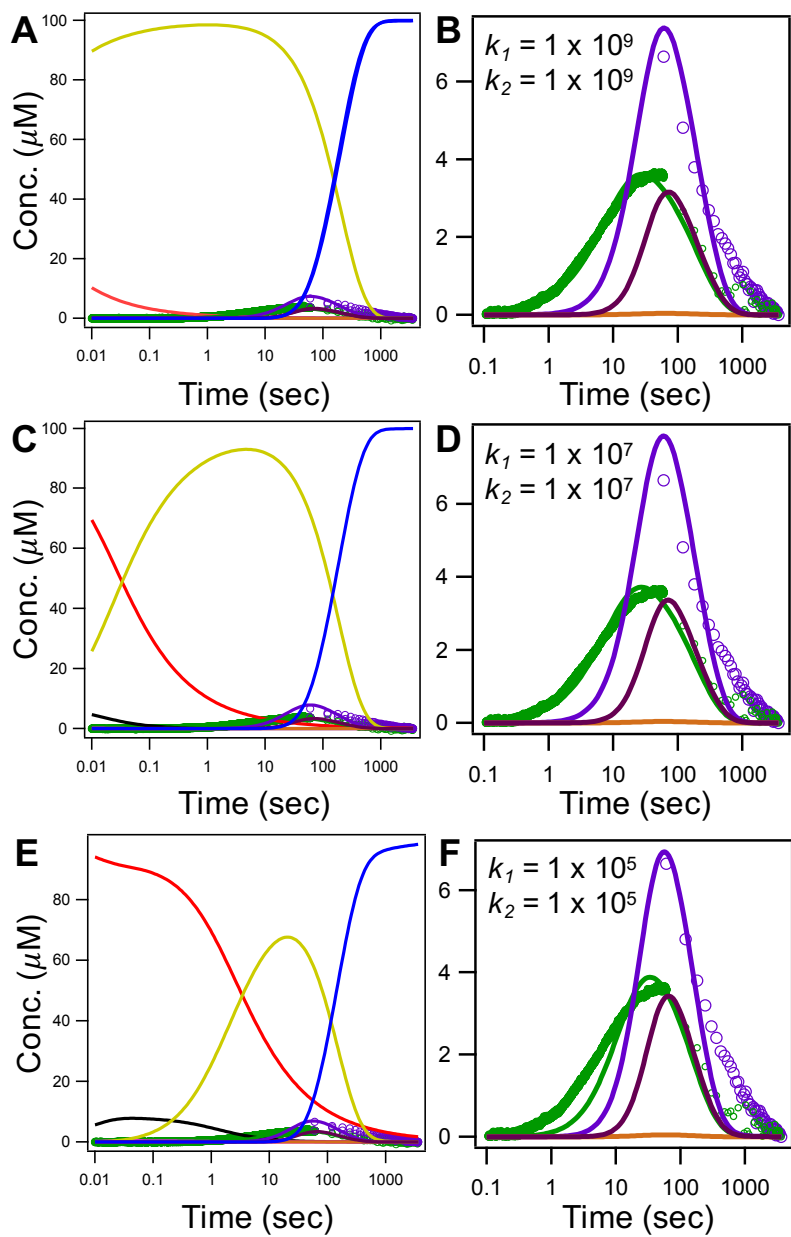

**ApoR2lox**, **Fe<sup>II</sup>-R2lox**, **Mn<sup>II</sup>/Fe<sup>II</sup>-R2lox**, **O<sub>2</sub> Adduct**, **μ(O<sub>2</sub>)-Mn<sup>III</sup>/Fe<sup>III</sup>**, **“IV/IV”**, **“IV/III”**, **Bis-μ(O)μ(OH)**, **Product**

**Figure S5.** Changes in reaction model as rates of metal binding and O<sub>2</sub> access are adjusted. At rates slower than  $1 \times 10^7$  a good fit of the model to the data was not attainable; however, models using values of  $1 \times 10^7$  and  $1 \times 10^9$  for  $k_1$  produced fits comparable with those of the diffusion-limited model (Table S1).

**Table S1.** Rate constants from fitting<sup>a</sup> kinetic model to protiated (black) or deuterated (green) experiment data at various rates of metal binding and O<sub>2</sub> access to active site

| $k_{1,2}$                                                | $k_3$ (min <sup>-1</sup> ) | $k_4$ (min <sup>-1</sup> ) | $k_5$ (min <sup>-1</sup> ) <sup>b</sup> | $k_7$ (min <sup>-1</sup> ) <sup>c</sup> |
|----------------------------------------------------------|----------------------------|----------------------------|-----------------------------------------|-----------------------------------------|
| <b>1 x 10<sup>10</sup> M<sup>-1</sup> s<sup>-1</sup></b> | 0.30 ± 0.02                | 7.20 ± 0.45                | 3.12 ± 1.15                             | 7.20 ± 0.74                             |
| <b>1 x 10<sup>10</sup> M<sup>-1</sup> s<sup>-1</sup></b> | 0.159 ± 0.001              | 3.504 ± 0.034              | 2.400 ± 0.217                           | N/A                                     |
| <b>1 x 10<sup>9</sup> M<sup>-1</sup> s<sup>-1</sup></b>  | 0.30 ± 0.03                | 7.20 ± 0.36                | 3.12                                    | 7.20 ± 5.89                             |
| <b>1 x 10<sup>7</sup> M<sup>-1</sup> s<sup>-1</sup></b>  | 0.33 ± 0.17                | 7.50 ± 1.89                | 3.12                                    | 7.20                                    |
| <b>1 x 10<sup>5</sup> M<sup>-1</sup> s<sup>-1</sup></b>  | 0.73                       | 8.10                       | 4.20                                    | 8.40                                    |

<sup>a</sup>Rates given without standard error represent values which were manually determined during fitting

<sup>b</sup>UV-Vis data for decay of the high-valent intermediate likely contained background signal from metal-oxo absorbance and values for  $k_5$  were held under slower conditions

<sup>c</sup>Rates for product formation were held in models with  $k_{1,2}$  slower than 1x10<sup>9</sup>, as lack of data for intermediates prior to product formation made fitting more difficult.



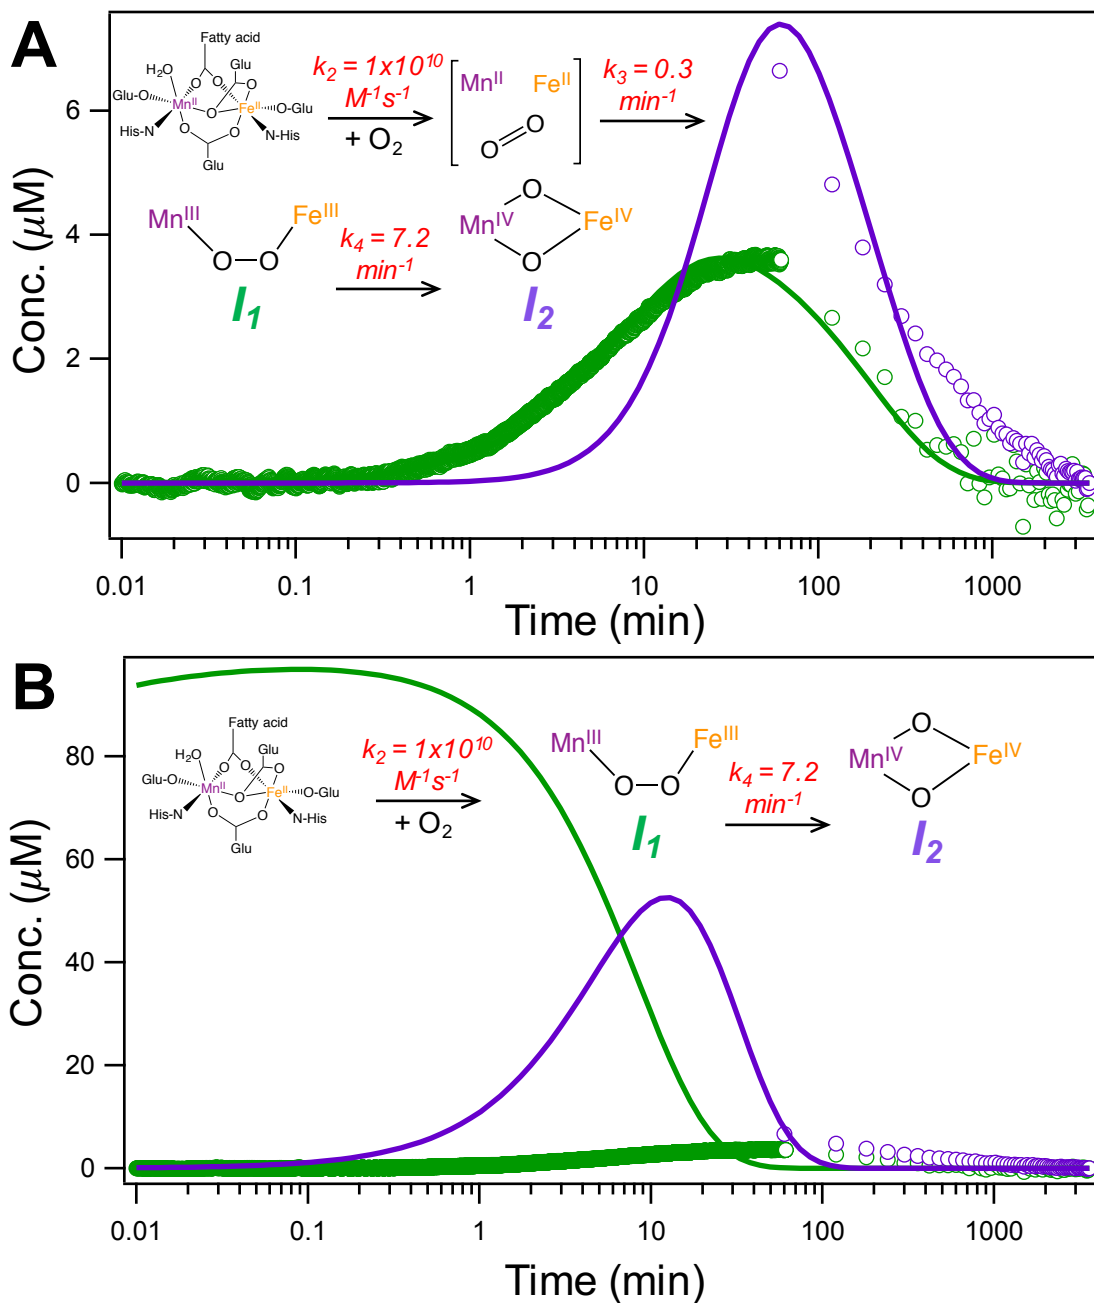

**Figure S6.** Justification for conformationally gated reaction of  $\text{O}_2$  with metals. KinTek model showing formation of  $I_1$  under diffusion-limited conditions considering (A) a slow conformational step following  $\text{O}_2$  addition to the protein and (B) direct, diffusion-controlled  $\text{O}_2$  binding to the metal centers. In the case of (B), high concentrations of  $I_1$  would be expected and formation would not be resolved, a significant departure from experimental observations. The depicted  $\text{O}_2$ -adduct likely resembles the “O” state of sMMO.<sup>4</sup>

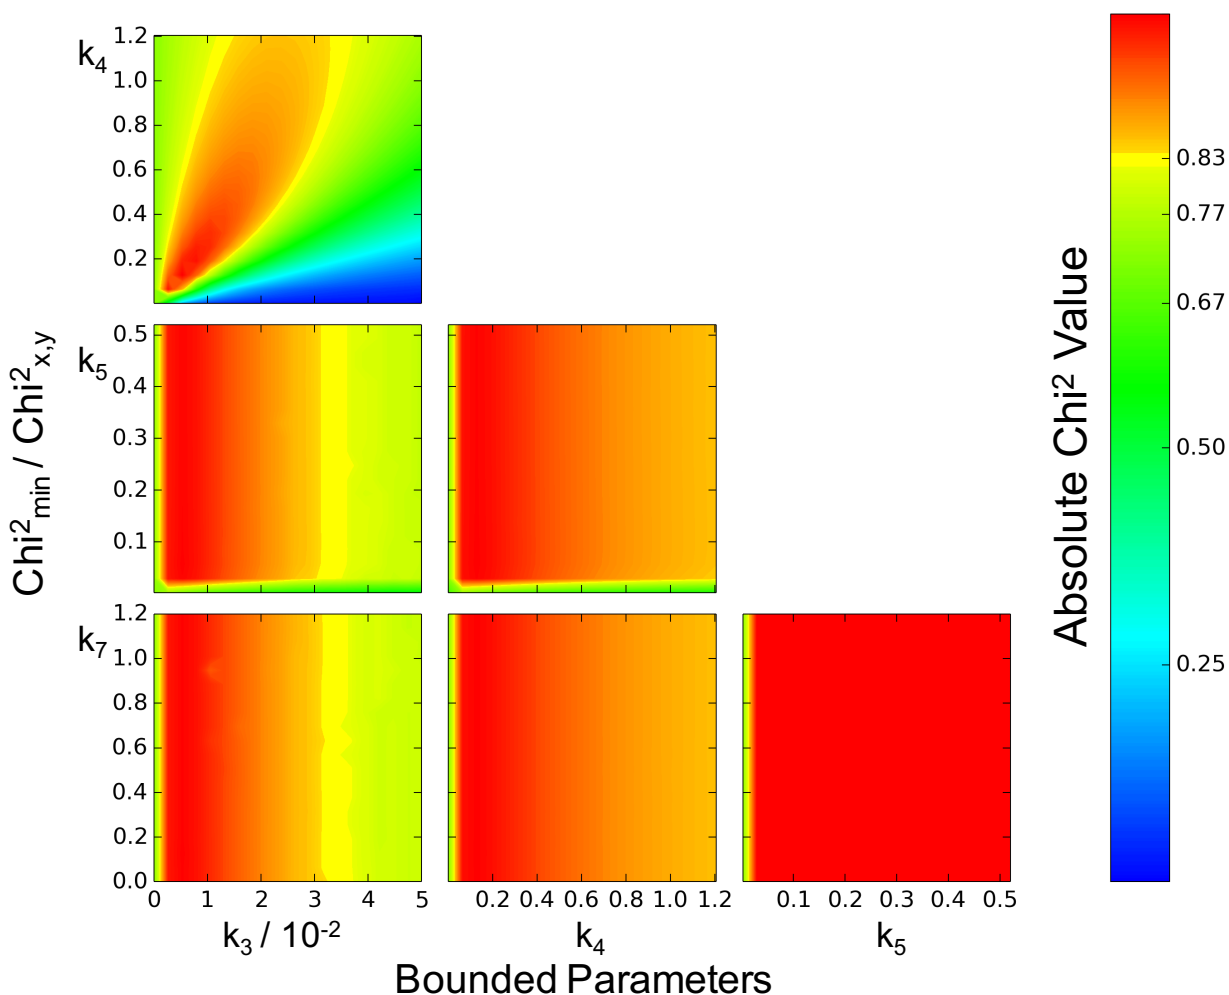

**Figure S7.** 2D FitSpace analysis on overall fit of kinetic model utilizing built-in KinTek routines.  $\chi^2$  threshold was set to 0.7143 with  $k_3, k_4, k_5, k_7$ , allowed to vary. Absolute  $\chi^2$  value scale illustrates the location of parameter bounds. These boundaries are defined by examining parameter values in all the possible pair-wise combinations between two parameters, specifically where they can co-vary and produce a good fit. Based on this analysis,  $k_3$  is the best constrained, with previous fitted values for  $k_4$  and  $k_5$  consisting of the upper boundary for these parameters. Product formation ( $k_7$ ) is the least constrained with minimal bounds.

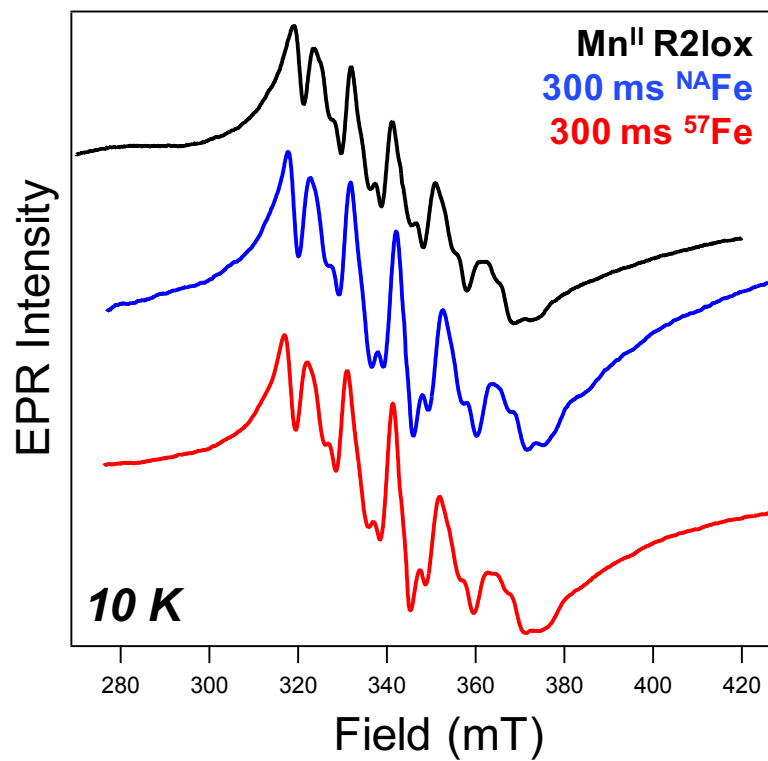

**Figure S8.** CW X-band EPR spectra of Mn<sup>II</sup>-only R2lox (black) compared to 300 ms RFQ samples prepared with <sup>56</sup>Fe (blue) and <sup>57</sup>Fe (red).

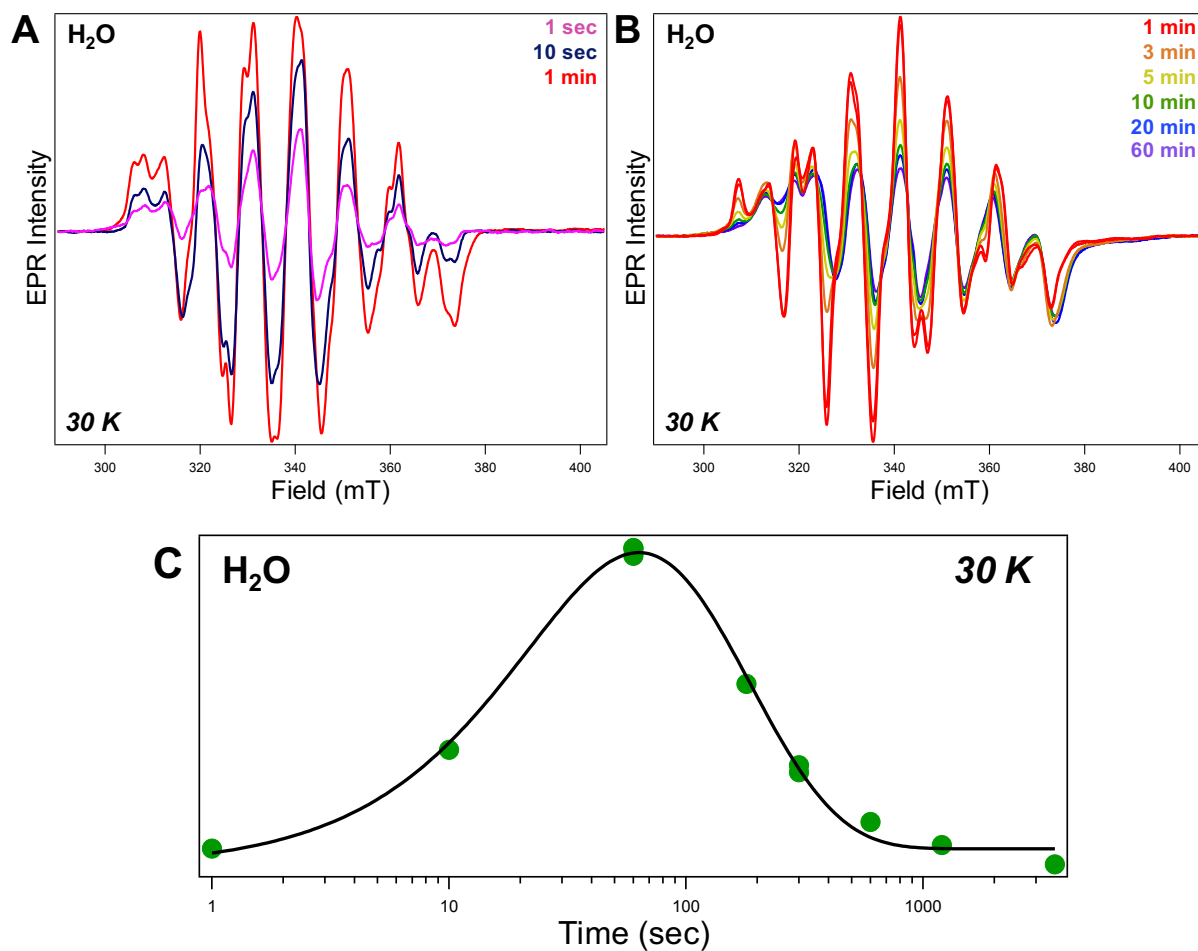

**Figure S9.** (A) Formation and (B) decay of  $I_l$  monitored at 30 K. Due to experimental constraints,  $^{57}\text{Fe}$  RFQ samples were measured in (A), while  $^{54}\text{Fe}$  HQ samples are shown in (B). Intermediate formation and decay monitored at  $\sim 307$  mT with best fit to double exponential shown (C).

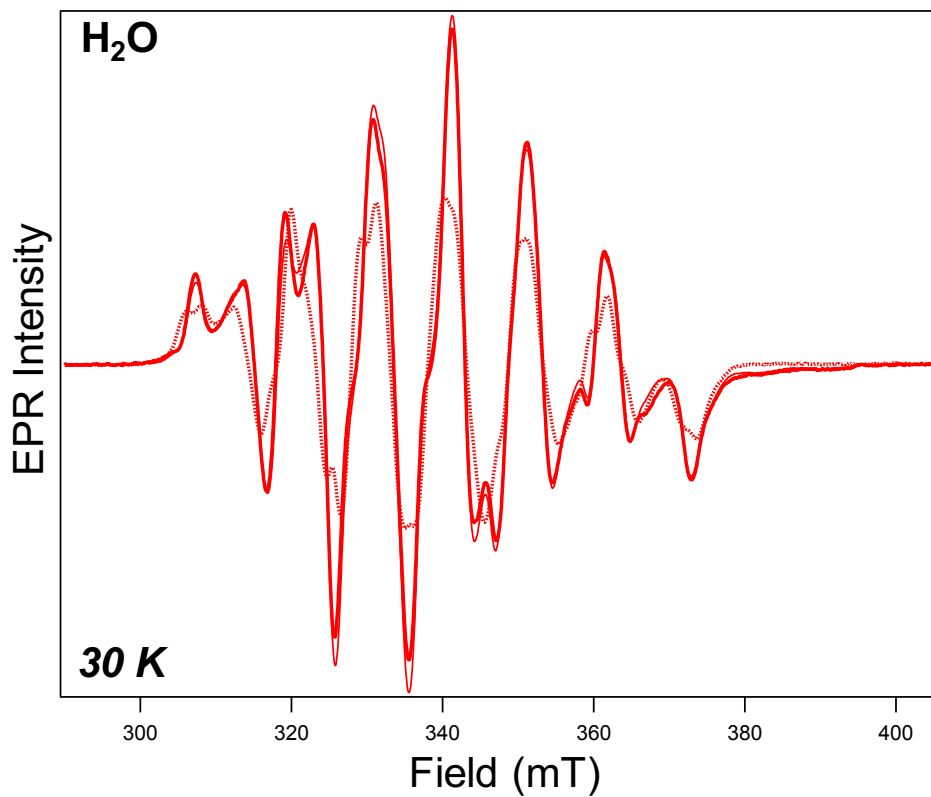

**Figure S10.** CW X-band EPR spectra of RFQ sample prepared with <sup>54</sup>Fe (thick line), RFQ sample prepared with <sup>57</sup>Fe (dotted line), and HQ sample prepared with <sup>54</sup>Fe (thin line), all quenched at  $t = 1$  min and measured at 30 K.

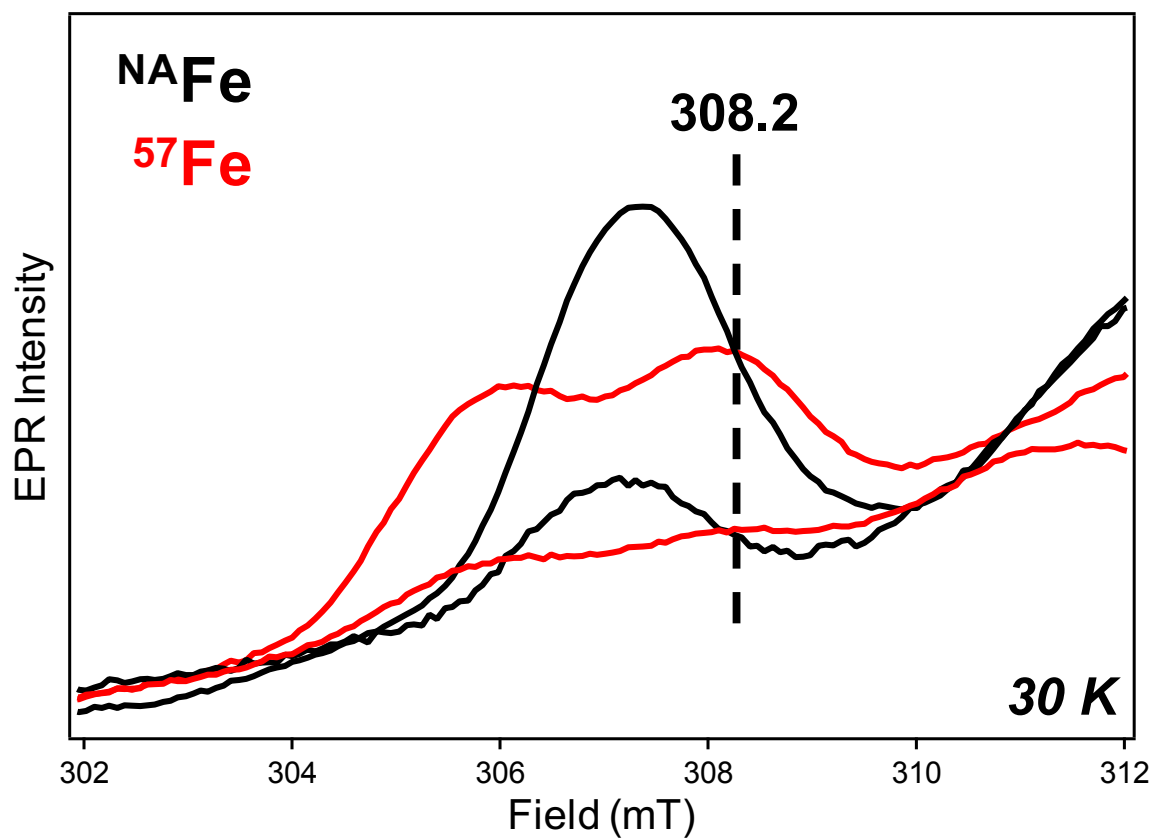

**Figure S11.** Isosbestic point used in  $I_l$  analysis.

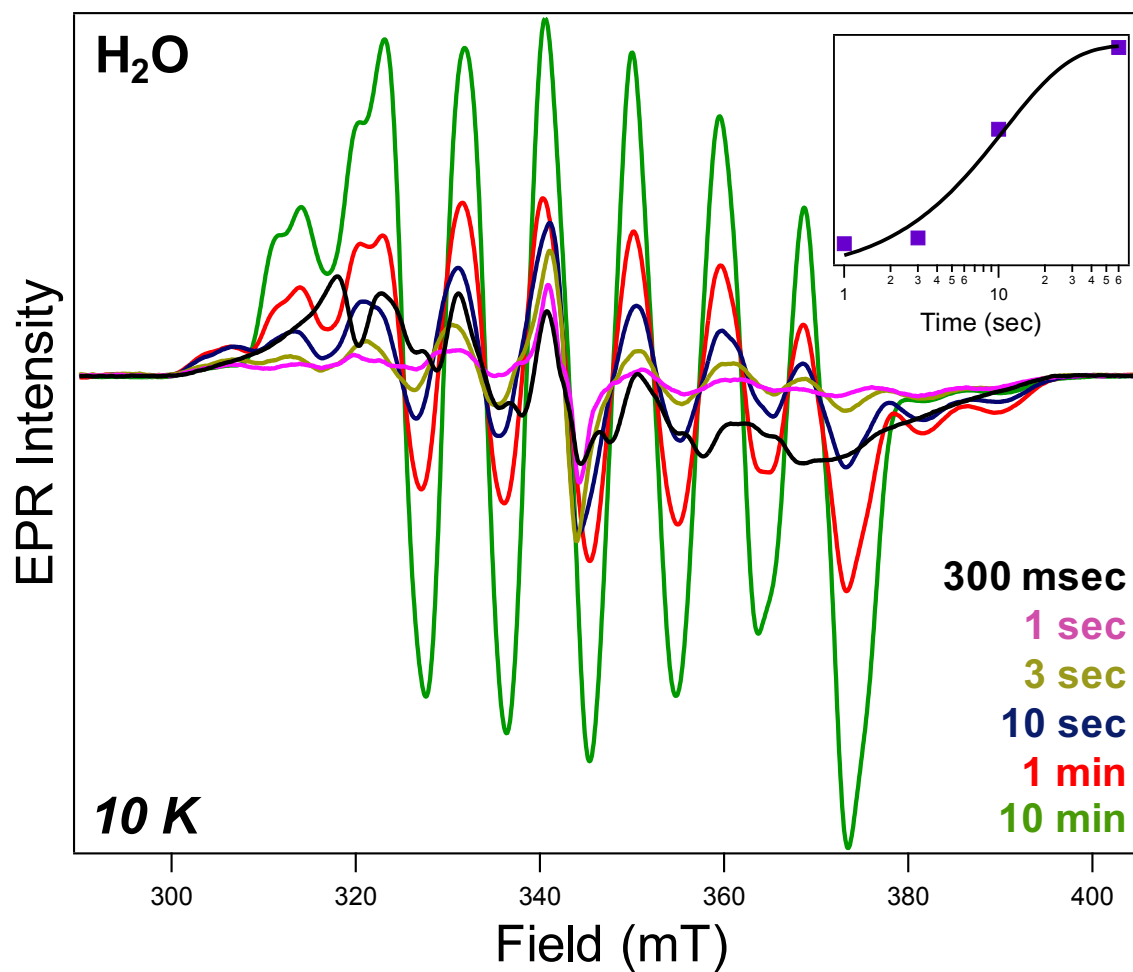

**Figure S12.** Formation of  $I_2$  monitored at 10 K, using RFQ samples prepared with  $^{57}\text{Fe}$ , (*inset*) kinetics of formation monitored at  $\sim 390$  mT from 1 sec – 1 min with best fit to single exponential shown.

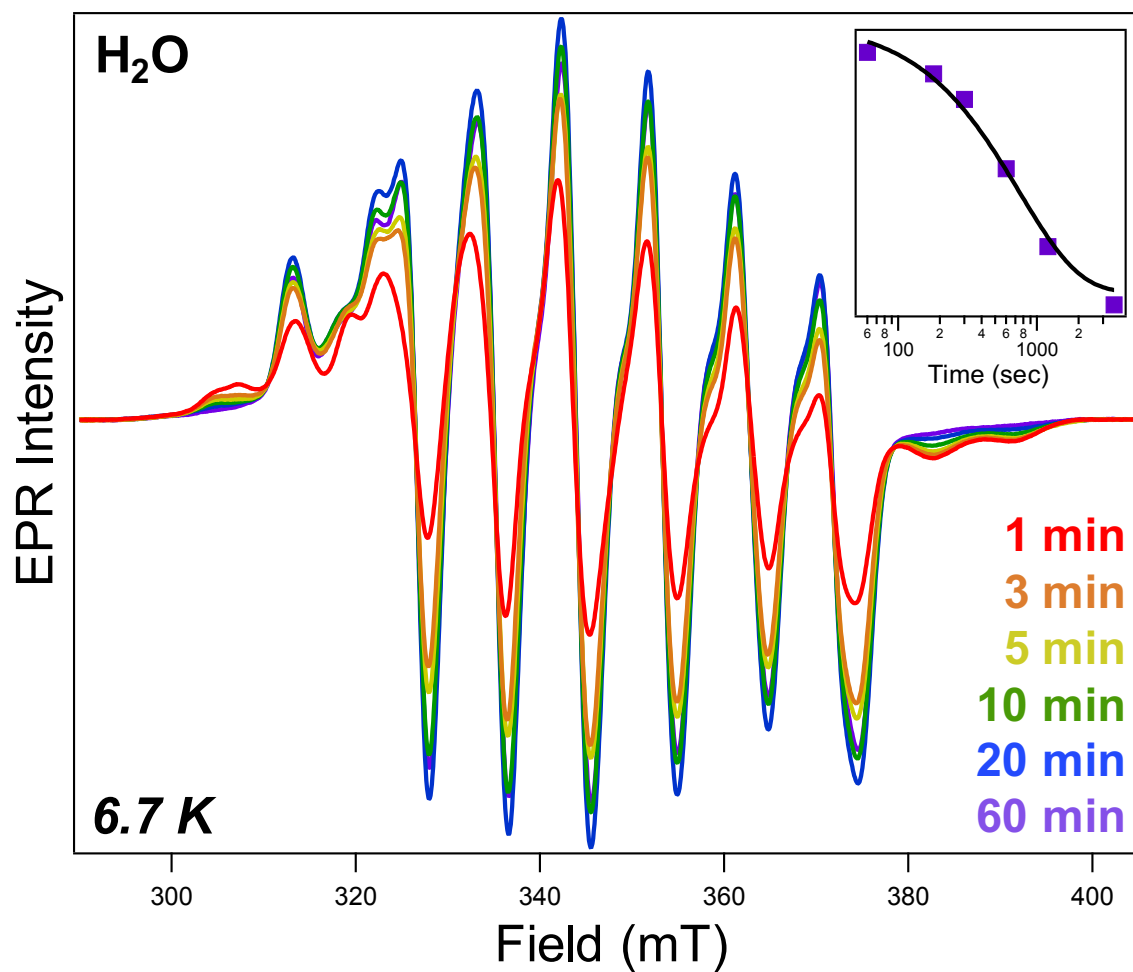

**Figure S13.** Decay of  $I_2$  monitored at 6.7 K. For 1 min and 5 min timepoints, spectra of  $^{57}\text{Fe}$  HQ samples are shown, (*inset*) kinetics of decay monitored at  $\sim 390$  mT from 1 min – 60 min with best fit to single exponential shown.



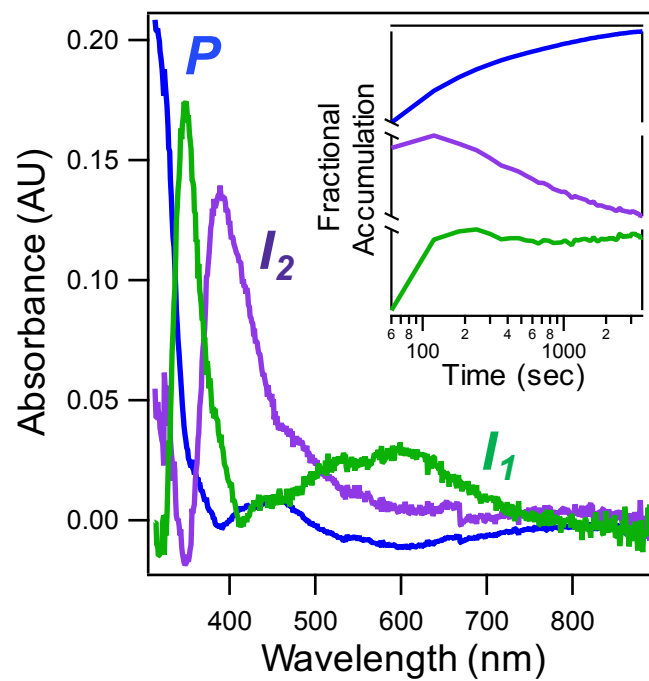

**Figure S14.** Postulated absorption spectra and concentration profiles of singular value decomposition (SVD) on Mn/Fe R2lox assembly in deuterated buffer.

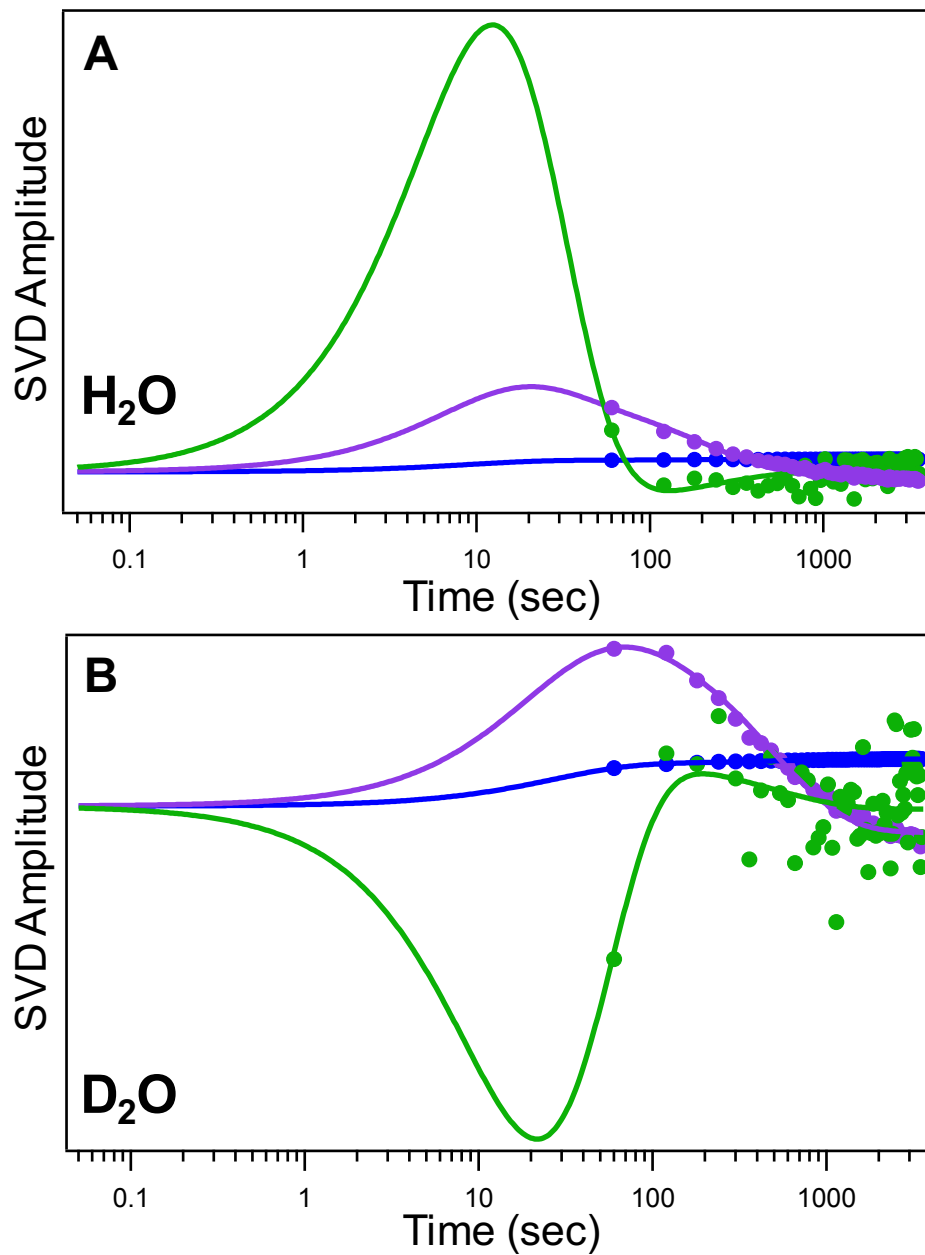

**Figure S15.** Overlay of SVD amplitudes representing  $I_1$  (green)  $I_2$  (purple) and product (blue) with experimental observables as a global analysis. Good agreement is shown in both protiated (*top*) and deuterated (*bottom*) solvent data sets.

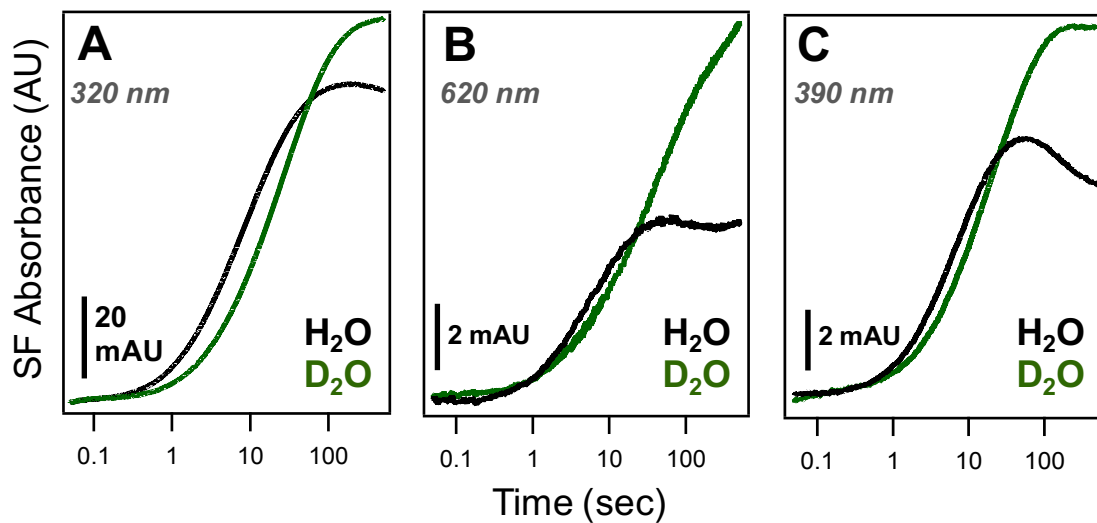

**Figure S16.** SF-Abs of Mn/Fe R2lox in both protiated (black) and deuterated (green) buffers. (A – B) Product and  $I_1$  formation monitored at 320 nm and 620 nm, respectively. (C)  $I_2$  formation in deuterated buffer monitored at 390 nm. Slight formation KIEs are observed in intermediates, with a more pronounced overall KIE for formation evident in product.

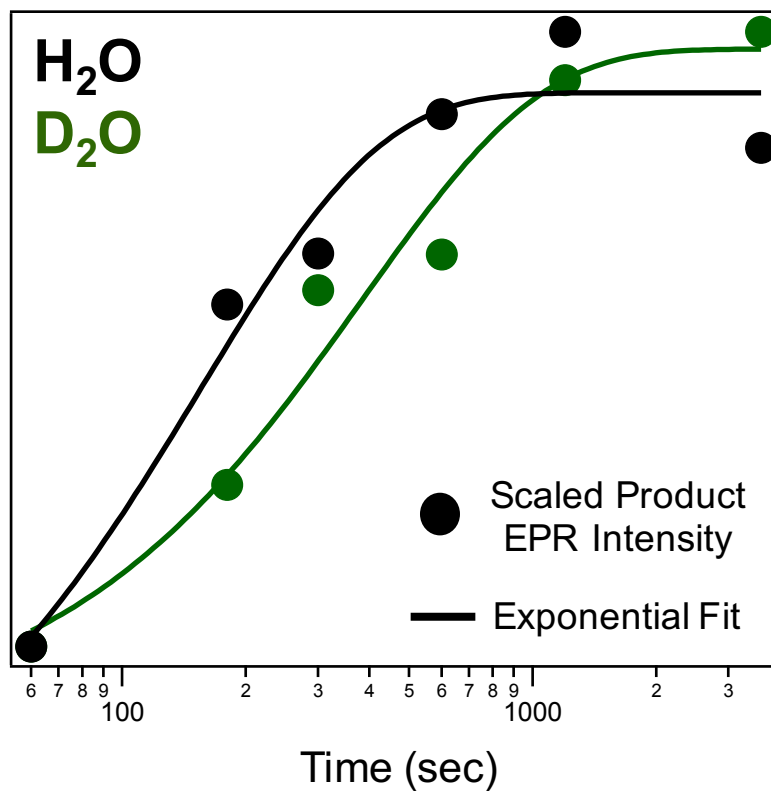

**Figure S17.** Product formation in protiated and deuterated solvent experiments monitored by change in EPR intensity. Single-exponential fits of the data result in an apparent  $\text{KIE}_{\text{product}} \sim 2.4$ , with  $k_{7,\text{protiated}} = 0.38 \text{ min}^{-1}$  and  $k_{7,\text{deuterated}} = 0.16 \text{ min}^{-1}$ .

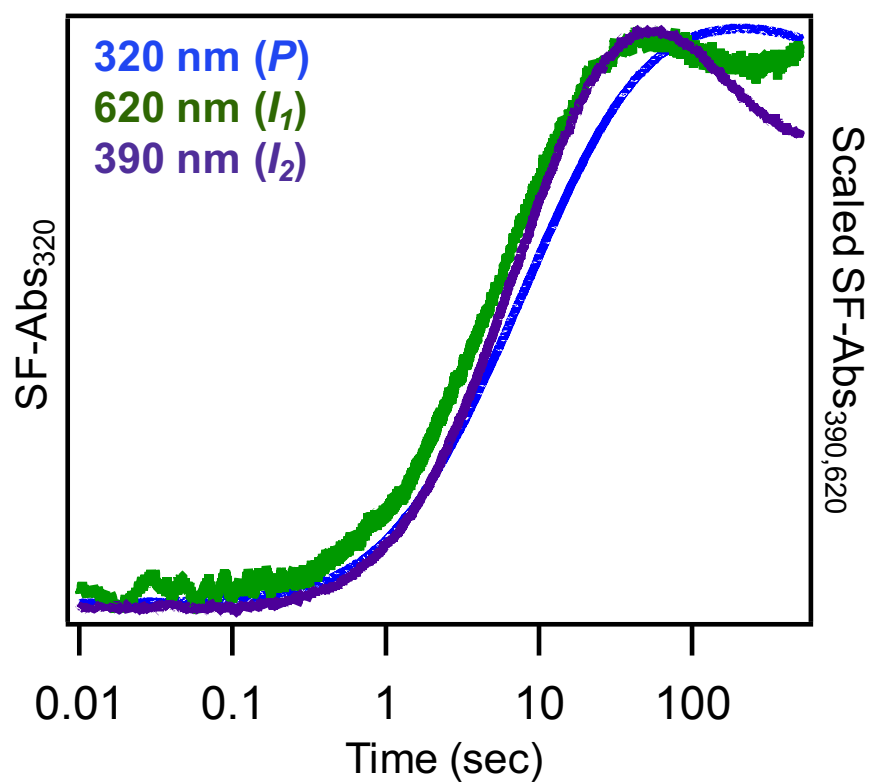

**Figure S18.** Normalized SF-Abs for 100  $\mu$ M apo-R2lox + 1 equiv.  $Mn^{II}$  + 1 equiv.  $Fe^{II}$  in aerated buffer at 620 nm, 390 nm, and 320 nm. Absorbance of  $I_1$  and  $I_2$  precedes product formation, and both intermediates show maximum absorbance at  $\sim$ 40 sec.

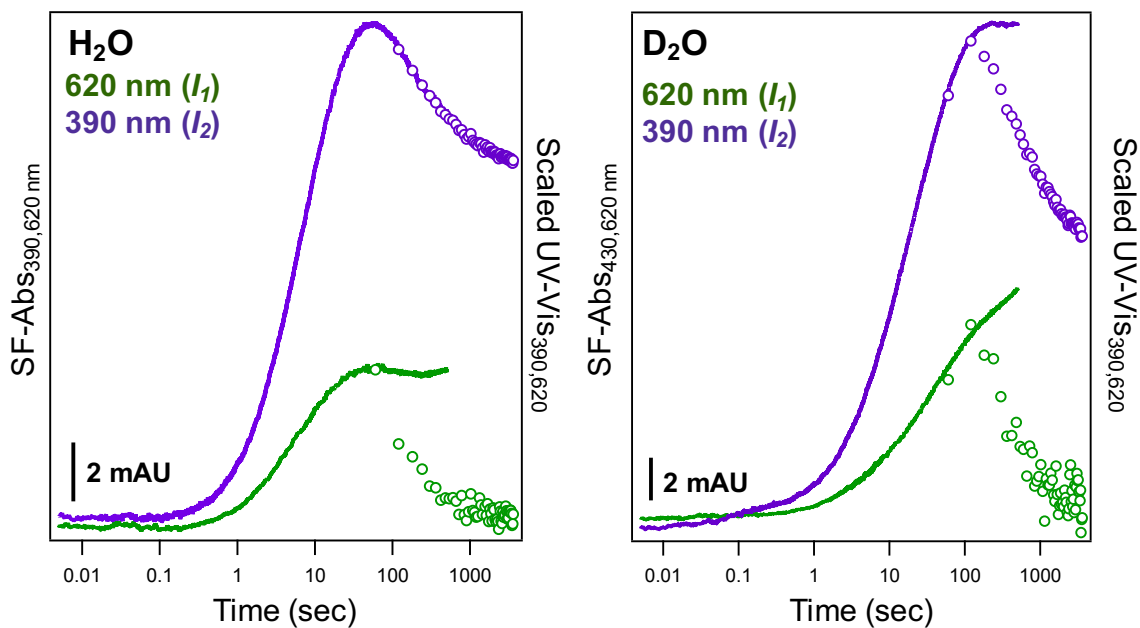

**Figure S19.** SF-Abs (solid lines) of 100  $\mu$ M apo-R2lox + 1 equiv.  $\text{Mn}^{\text{II}}$  + 1 equiv.  $\text{Fe}^{\text{II}}$  in aerated protiated (*left*) and deuterated (*right*) buffer. Data are overlaid with scaled UV-Vis absorbance values (open circles) from reconstitution data, showing moderate agreement between measurement methods with widely different mixing technique. Lack of defined peaks in  $\text{D}_2\text{O}$  is attributed to increased precipitation of either  $\text{Fe}^{\text{II}}$  or protein over extended times, as R2lox is less stable in  $\text{D}_2\text{O}$ .

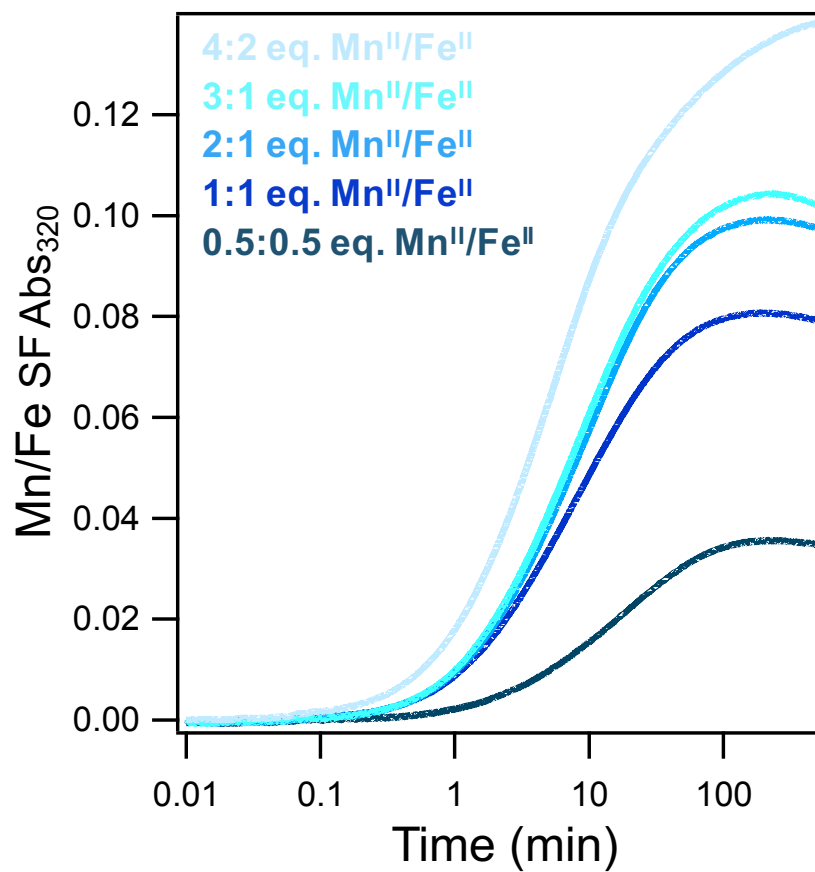

**Figure S20.** Metal titrations of Mn/Fe R2lox. Metal concentrations were increased in Mn/Fe SF-Abs experiments in an attempt to achieve pseudo-second order kinetic conditions. With the addition of greater than stoichiometric amounts of Fe<sup>II</sup> (e.g., 4:2 Mn:Fe), product formation appears to continue to increase over long times.

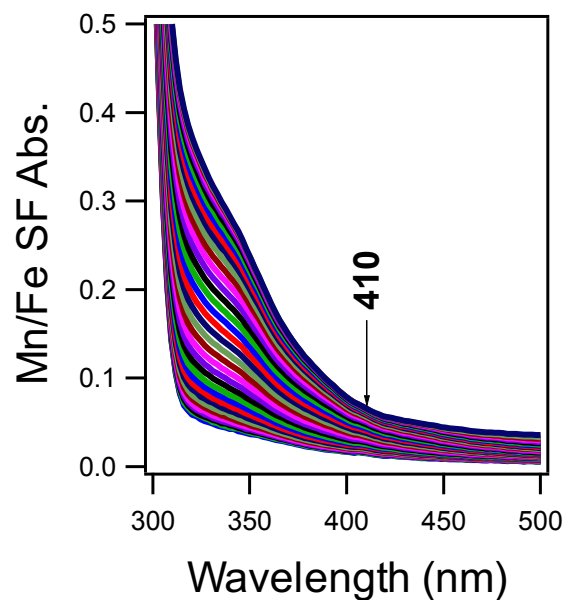

**Figure S21.** Diode-array SF-Abs of Mn/Fe R2lox. Apo-R2lox was mixed with 1 equivalent of  $\text{Mn}^{\text{II}}$  and  $\text{Fe}^{\text{II}}$  in aerobic buffer. Traces were collected using logarithmic time spacing for a period of 500 seconds; every 20<sup>th</sup> trace collected is shown. The absence of a sharp peak at 410 nm indicates an absence of the proposed tyrosyl radical under the experimental conditions,<sup>5,6</sup> though rapid decay of such a species may also preclude intermediate accumulation. As mentioned in the text, photodegradation of the sample by multiwavelength light prevented quantitative analysis of intermediate formation; however, qualitative analysis agrees with the single-wavelength data.



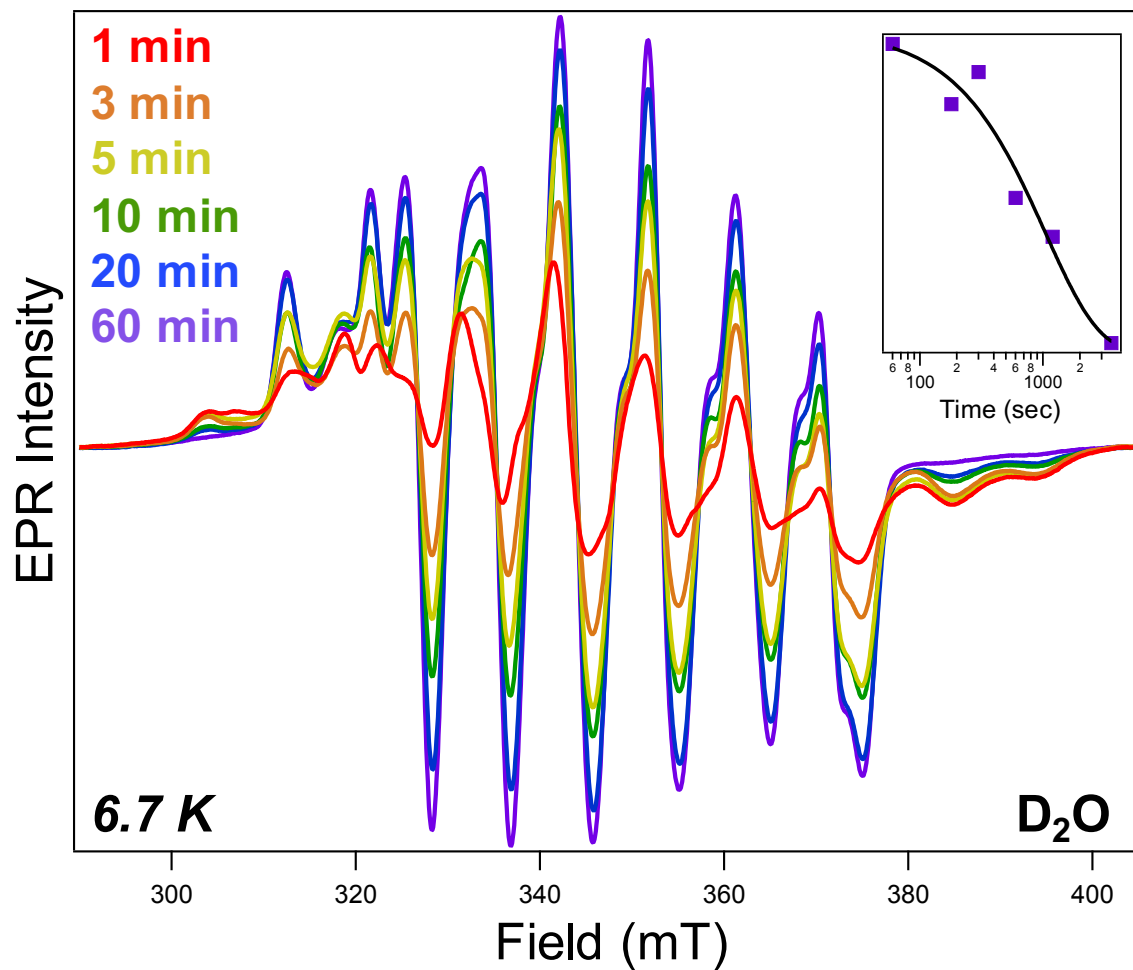

**Figure S22.** Decay of  $I_2$  in deuterated buffer collected at 6.7 K, (*inset*) kinetics of decay monitored at  $\sim 394$  mT with best fit to single exponential shown.

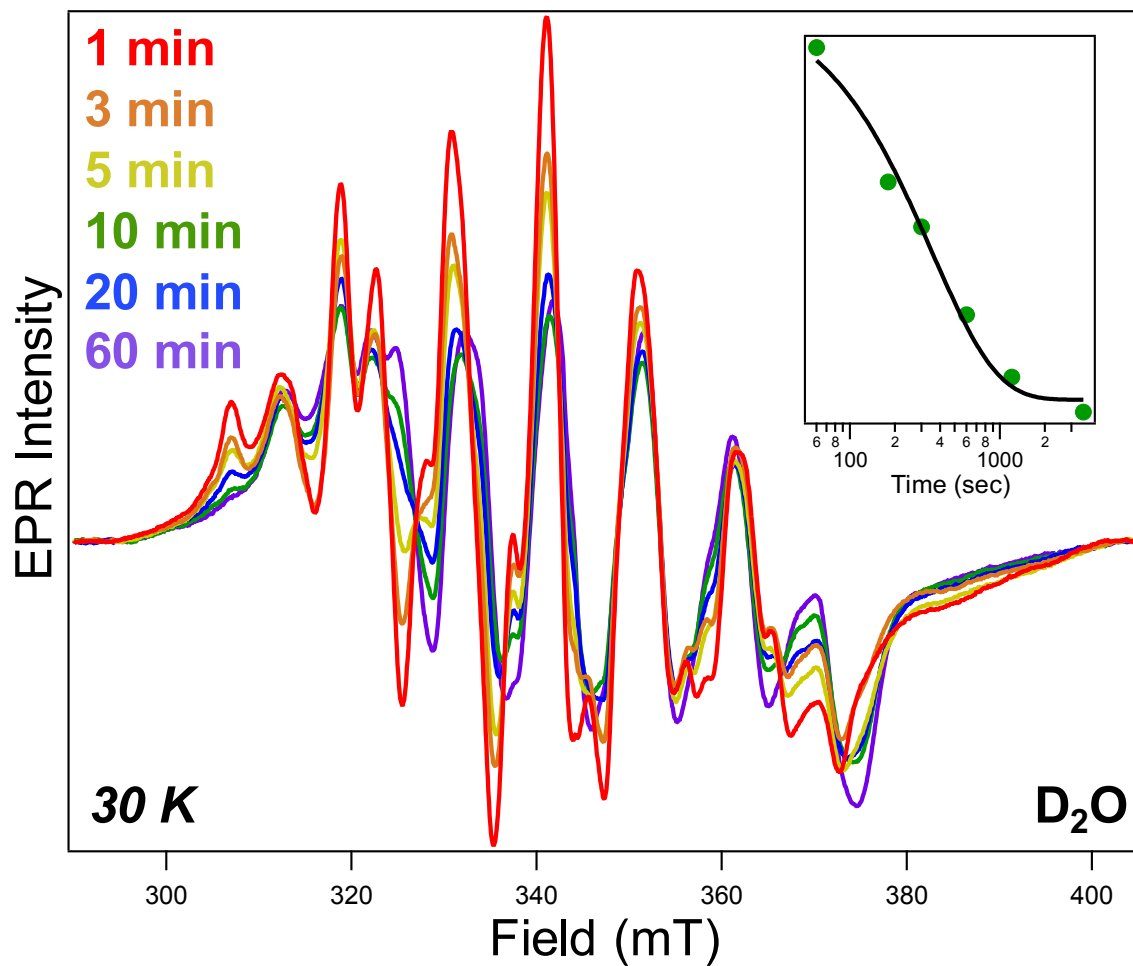

**Figure S23.** Decay of  $I_1$  in deuterated buffer collected at 30 K, (*inset*) decay kinetics monitored at  $\sim 307$  with best fit to single exponential shown.

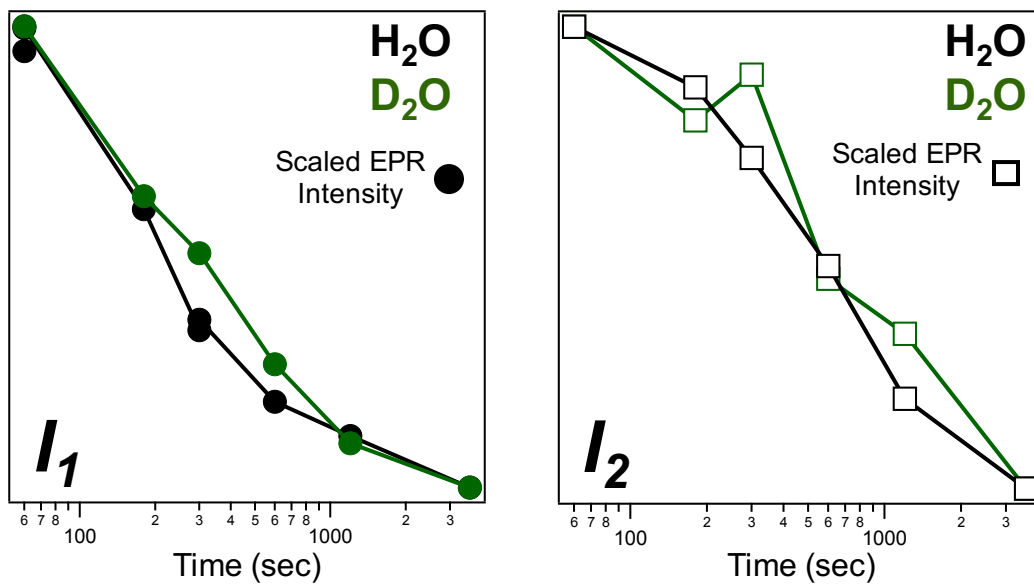

**Figure S24.** Isotope effects on the kinetic profiles of each intermediate observed via EPR.

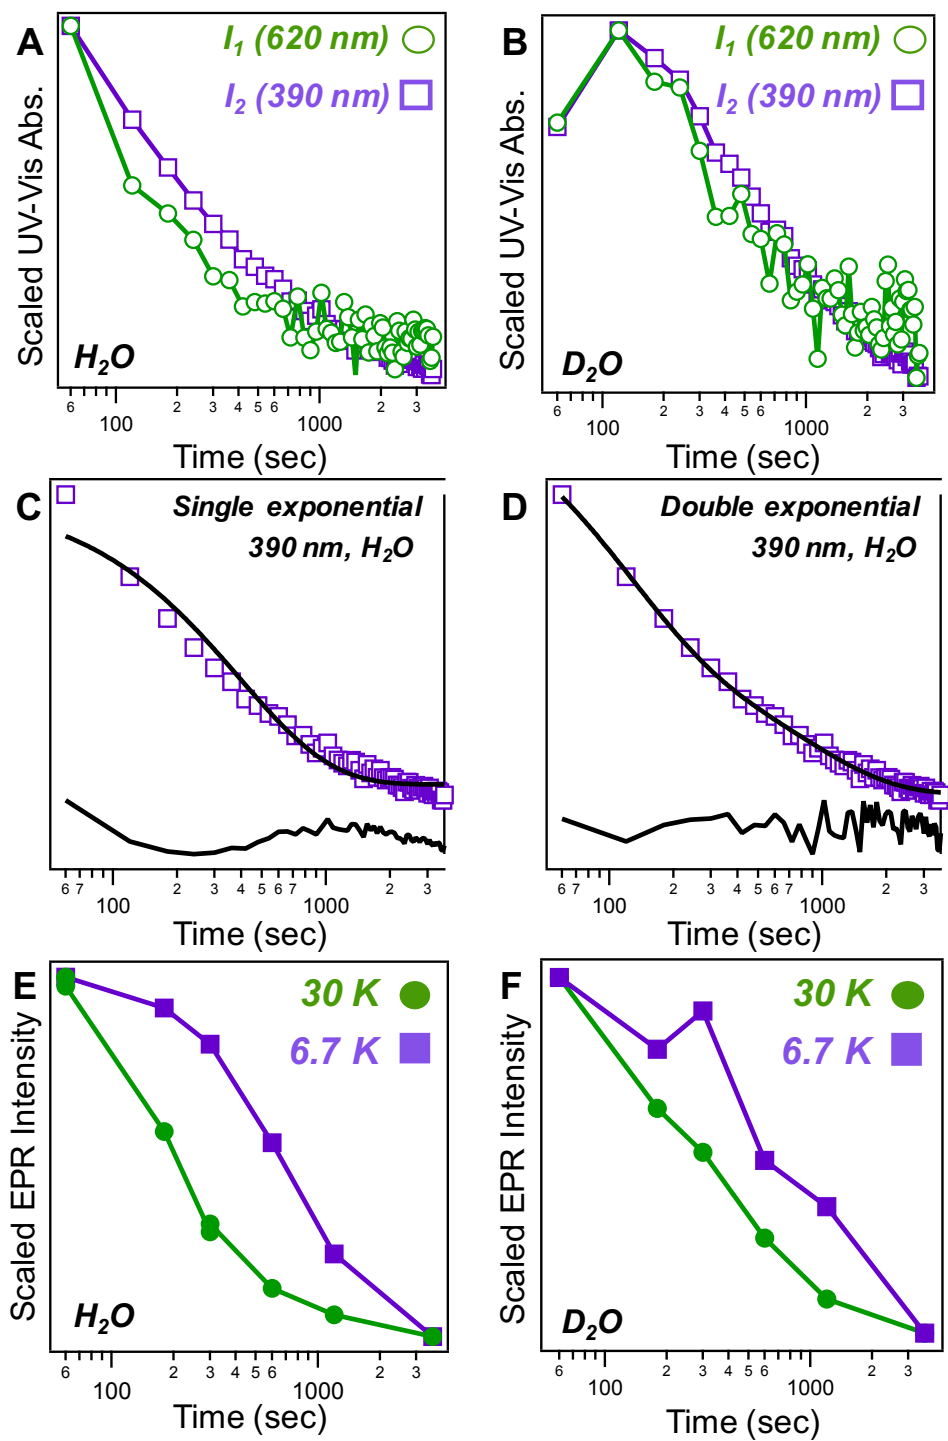

**Figure S25.** Comparison between optical (A-B) and EPR (E-F) kinetic profiles for distinct intermediates in both protiated and deuterated buffers. In both methods, the decay of  $I_1$  occurs at a faster rate than that of  $I_2$ . Decay of  $I_2$  and best fit shown using a single (C) and double (D) exponential function. Residuals for each fit shown below data.

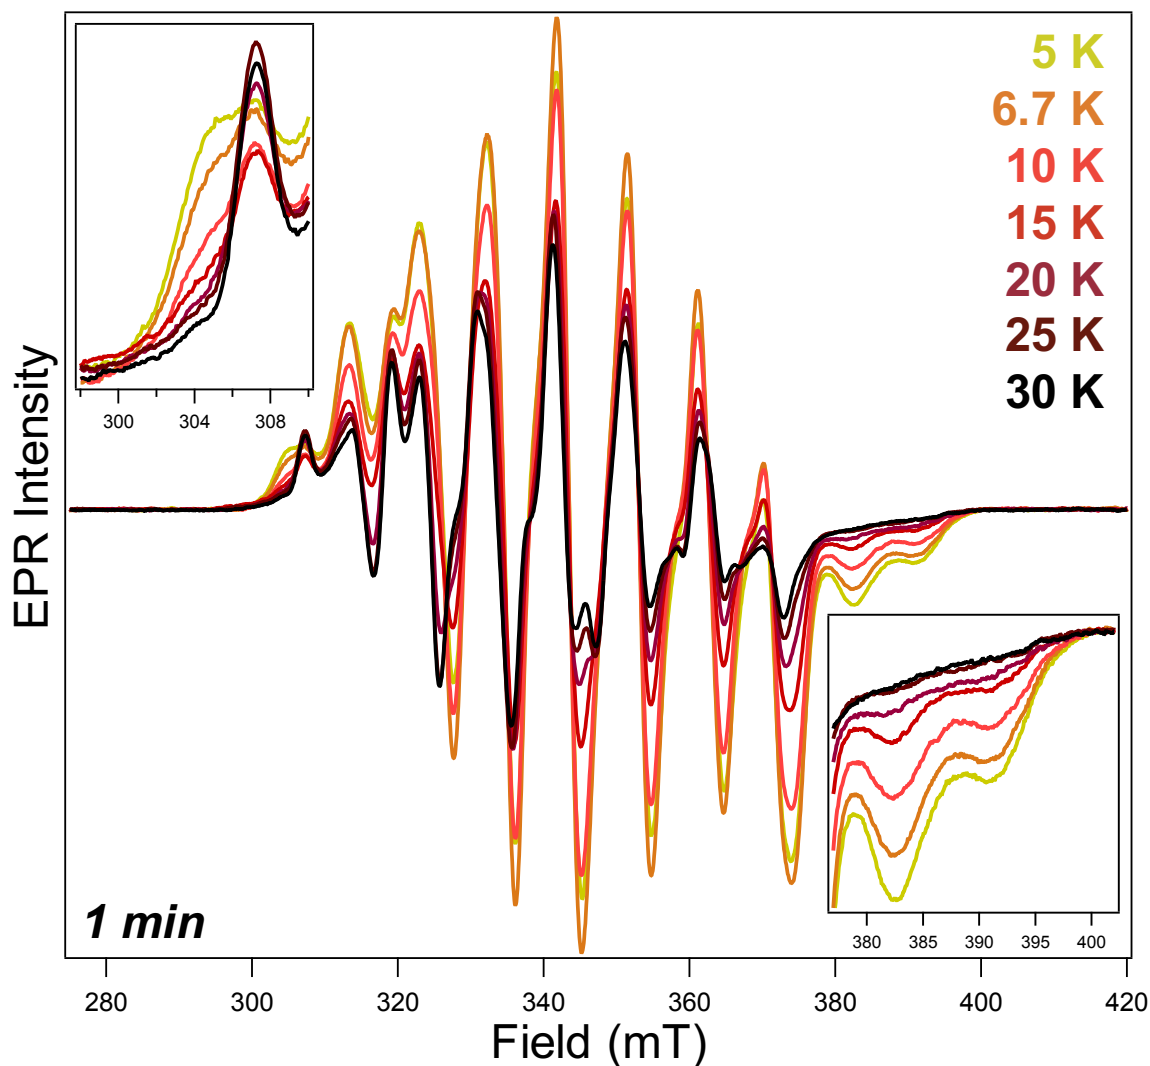

**Figure S26.** Variable temperature CW X-band EPR spectra of Mn/Fe R2lox hand-quenched at 1 min. Differential relative intensities in low-field signals (*top inset*) show the 307.3 mT species, previously seen only in shorter time points, becoming more intense at higher temperatures. This suggests a slower relaxation time for this species. The 304.8 mT signal shows an approximately inverse temperature dependence, consistent with rapid relaxation rates. The high-field features (*bottom inset*) display a temperature dependence similar to that of the 304.8 mT low-field signal, providing evidence that these signals originate from the same species.

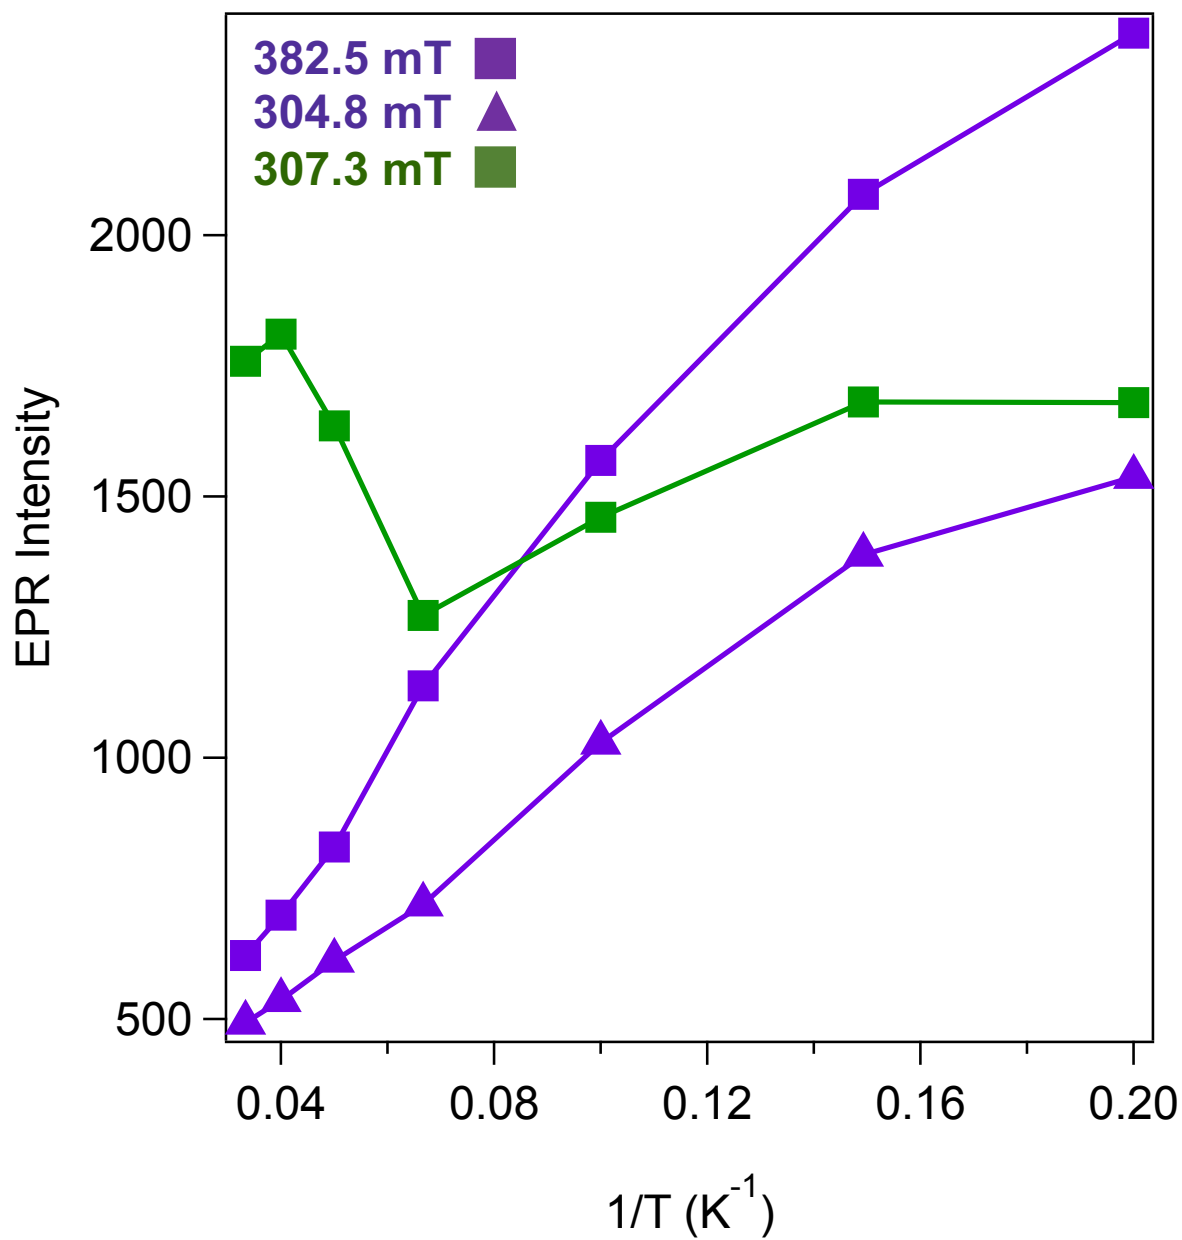

**Figure S27.** Temperature dependence on EPR intensities of spectral features of intermediate species. Both low- ( $\Delta$ ) and high- ( $\square$ ) field features seen in the broad EPR-active species ( $I_2$ ) exhibit Curie-like behavior and increase linearly with inverse temperature (purple). Low-field ( $\square$ ) feature of narrow EPR-active species ( $I_1$ ) does not display a linear dependence on the inverse of temperature (green).

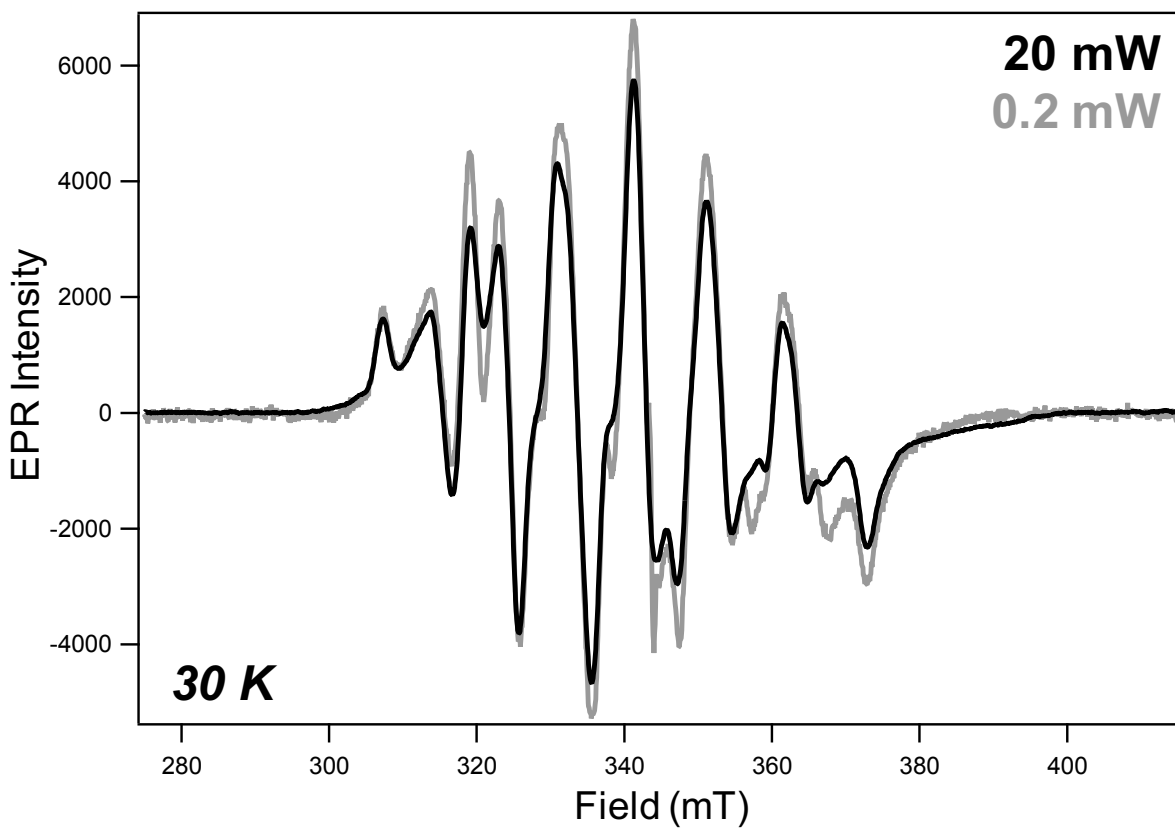

**Figure S28.** Power dependence of EPR spectrum of  $I_1$  at 30 K. Signals were scaled appropriately (by  $P^{1/2}$ ) to account for different absolute signal intensities.

### Supplemental References:

- (1) Kutin, Y., Srinivas, V., Fritz, M., Kositzki, R., Shafaat, H. S., Birrell, J., Bill, E., Haumann, M., Lubitz, W., Högbom, M., Griese, J. J., and Cox, N. (2016) Divergent assembly mechanisms of the manganese/iron cofactors in R2lox and R2c proteins. *J. Inorg. Biochem.* 162, 164–177.
- (2) Rajakovich, L. J., Nørgaard, H., Warui, D. M., Chang, W., Li, N., Booker, S. J., Krebs, C., Bollinger, J.M., Jr., and Pandelia, M.-E. (2015) Rapid reduction of the diferric-peroxyhemiactal intermediate in aldehyde-deformylating oxygenase by a cyanobacterial ferredoxin: evidence for a free-radical mechanism. *J. Am. Chem. Soc.* 137, 11695–11709.
- (3) Shafaat, H. S., Griese, J. J., Pantazis, D. A., Roos, K., Andersson, C. S., Popović-Bijelić, A., Gräslund, A., Siegbahn, P. E. M., Neese, F., Lubitz, W., Högbom, M., and Cox, N. (2014) Electronic structural flexibility of heterobimetallic Mn/Fe cofactors: R2lox and R2c proteins. *J. Am. Chem. Soc.* 136, 13399–13409.
- (4) Banerjee, R., Meier, K. K., Münck, E., and Lipscomb, J. D. (2013) Intermediate P\* from soluble methane monooxygenase contains a diferrous cluster. *Biochemistry* 52, 4331–4342.
- (5) Bollinger, J.M., Jr., Edmondson, D. E., Huynh, B. H., Filley, J., Norton, and Stubbe, J. (1991) Mechanism of assembly of the tyrosyl radical-dinuclear iron cluster cofactor of ribonucleotide reductase. *Science* 253, 292–298.
- (6) Larsson, A., and Sjöberg, B. M. (1986) Identification of the stable free radical tyrosine residue in ribonucleotide reductase. *EMBO J.* 5, 2037–2040.
